# Supplementary material for: Expression Status And Prognostic Value Of M6A-associated Genes in Gastric Cancer
Source: PubMed Central journal article supplement (PMC7086255; doi:10.7150/jca.40866), 2020-03-04
Supplement: jcav11p3027s1.pdf [file jcav11p3027s1.pdf]

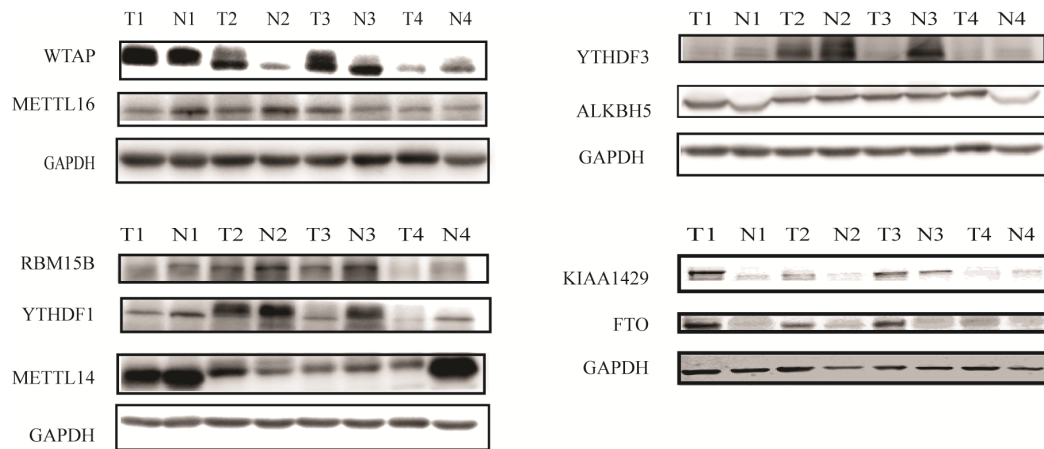

**Supplementary Figure 1.** Protein expression of m6A-related molecules in 4paired gastric tumor tissues (T) and normal control tissues (N)

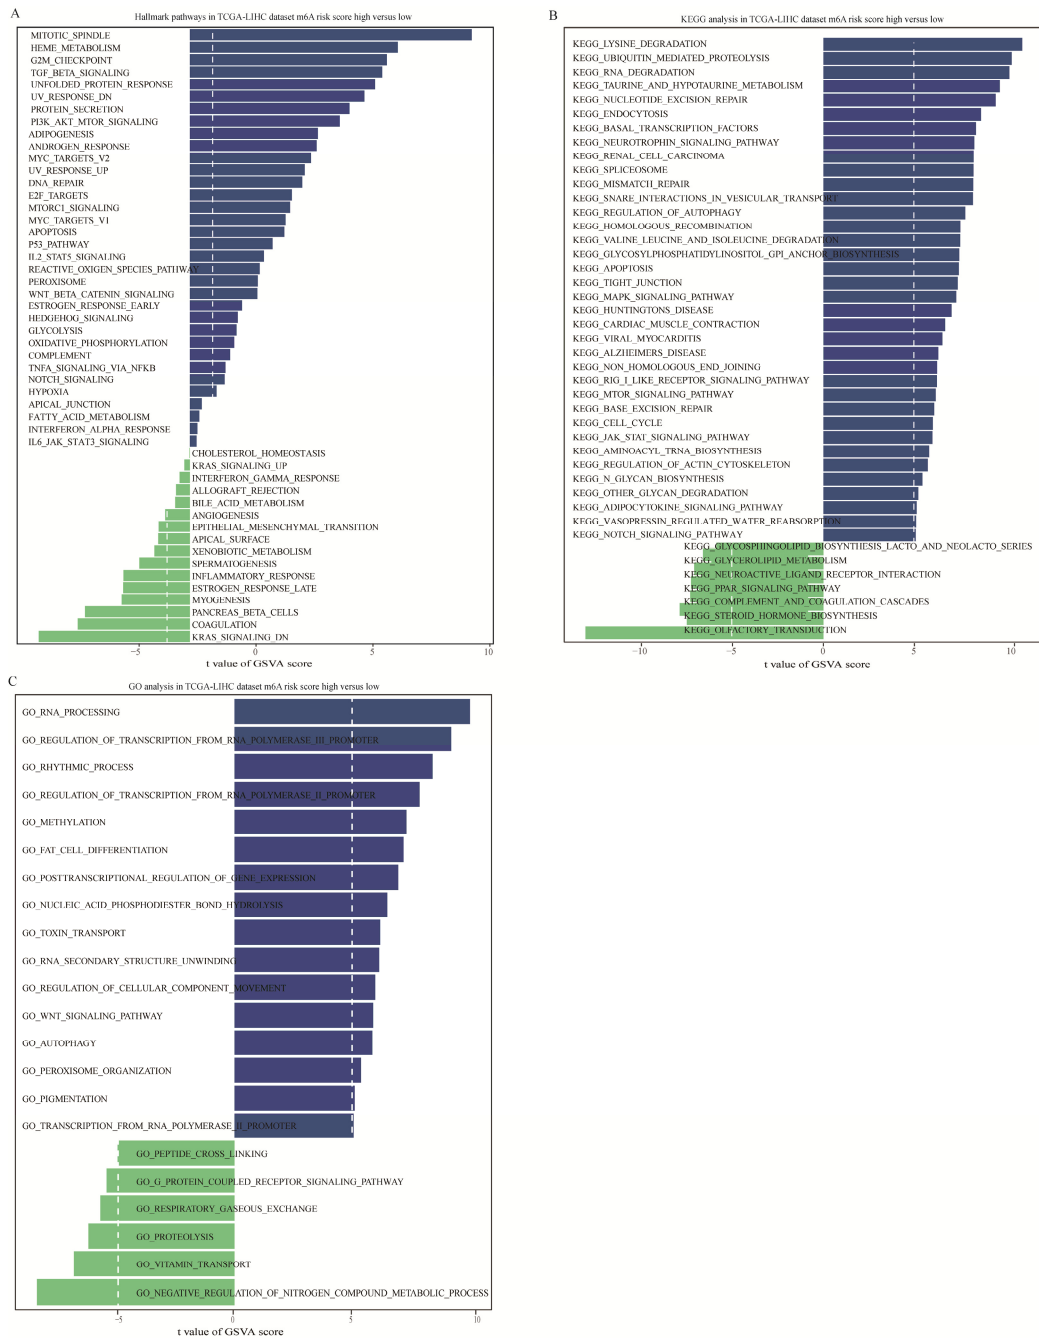

**Supplementary Figure 2.** M6A risk score related with gene signature involved signaling pathways.

**Supplementary Table 1.** The clinicopathological features of 20 GC patients.

| Sample | Race | Age | Gender | Grade | TNM stage |
|--------|------|-----|--------|-------|-----------|
| 1      | Han  | 64  | Male   | 2     | IIIa      |
| 2      | Han  | 64  | Male   | 2     | IIa       |
| 3      | Han  | 54  | Male   | 3     | IIb       |
| 4      | Han  | 71  | Male   | 2     | IIIa      |
| 5      | Han  | 65  | Male   | 2     | Ib        |
| 6      | Han  | 68  | Male   | 2     | IIIb      |
| 7      | Han  | 71  | Male   | 2     | IIIa      |
| 8      | Han  | 73  | Male   | 2     | IIa       |
| 9      | Han  | 58  | Female | 3     | IIIc      |
| 10     | Han  | 59  | Female | 2     | IIb       |
| 11     | Han  | 70  | Male   | 3     | IIb       |
| 12     | Han  | 65  | Male   | 2     | IIIc      |
| 13     | Han  | 59  | Male   | 2     | IIb       |
| 14     | Han  | 67  | Male   | 2     | IIIa      |
| 15     | Han  | 48  | Female | 3     | IIIb      |
| 16     | Han  | 65  | Male   | 1     | IIa       |
| 17     | Han  | 59  | Male   | 3     | IIb       |
| 18     | Han  | 64  | Male   | 2     | Ib        |
| 19     | Han  | 53  | Male   | 3     | IIIa      |
| 20     | Han  | 48  | Female | 3     | IIIa      |

**Supplementary Table 2.** The information of antibodies used in this study.

|                       | <b>Antibody</b> | <b>IHC</b> | <b>WB</b> | <b>Specificity</b>   | <b>Company</b>           |
|-----------------------|-----------------|------------|-----------|----------------------|--------------------------|
| <b>M6A<br/>writer</b> | WTAP            | 1:500      | 1:1000    | Mouse<br>Monoclonal  | Proteintech Group, China |
|                       | KIAA1429        | 1:200      | 1:1000    | Rabbit<br>Polyclonal | Proteintech Group, China |
|                       | RBM15           | 1:500      | 1:1000    | Rabbit<br>Polyclonal | Proteintech Group, China |
|                       | RBM15B          | 1:200      | 1:1000    | Rabbit<br>Polyclonal | Proteintech Group, China |
|                       | METTL3          | 1:200      | 1:1000    | Rabbit<br>Polyclonal | Proteintech Group, China |
|                       | METTL14         | 1:200      | 1:1000    | Rabbit<br>Polyclonal | Proteintech Group, China |
|                       | METTL16         | 1:200      | 1:1000    | Rabbit<br>Polyclonal | Proteintech Group, China |
| <b>M6A<br/>eraser</b> | ALKBH5          | 1:500      | 1:1000    | Rabbit<br>Polyclonal | Proteintech Group, China |
|                       | FTO             | 1:200      | 1:1000    | Rabbit<br>Polyclonal | Proteintech Group, China |
| <b>M6A<br/>reader</b> | YTHDC1          | 1:200      | 1:1000    | Rabbit<br>Polyclonal | Proteintech Group, China |
|                       | YTHDF1          | 1:200      | 1:1000    | Rabbit<br>Polyclonal | Proteintech Group, China |

|           |       |        |                   |                          |
|-----------|-------|--------|-------------------|--------------------------|
| YTHDF2    | 1:200 | 1:1000 | Rabbit Polyclonal | Proteintech Group, China |
| YTHDF3    | 1:200 | 1:1000 | Rabbit Polyclonal | Proteintech Group, China |
| HNRNPA2B1 | 1:500 | 1:1000 | Rabbit Polyclonal | Proteintech Group, China |
| HNRNPC    | 1:200 | 1:1000 | Rabbit Polyclonal | Proteintech Group, China |

**Supplementary Table3.** Independent prognostic factors for OS by stratified analysis in TCGA cohorts with age  $\leq$  median.

| Risk factors | Clinicopathological features | Univariate analysis |             |                | Multivariate analysis |             |                |
|--------------|------------------------------|---------------------|-------------|----------------|-----------------------|-------------|----------------|
|              |                              | HR                  | 95% (CI)    | <i>P</i> value | HR                    | 95% (CI)    | <i>P</i> value |
| Race         | White                        | 1.000               | 0.911-4.452 | 0.084          |                       |             |                |
|              | Others                       | 2.014               |             |                |                       |             |                |
| Gender       | Women                        | 1.000               | 0.901-2.622 | 0.115          |                       |             |                |
|              | Men                          | 1.537               |             |                |                       |             |                |
| TNM stage    | Stage I and II               | 1.000               | 1.028-3.037 | 0.039*         | 1.000                 | 1.055-3.118 | 0.031*         |

|        |                  |       |             |        |       |             |        |
|--------|------------------|-------|-------------|--------|-------|-------------|--------|
|        | Stage III and IV | 1.767 |             |        | 1.813 |             |        |
| RBM15B | Low              | 1.000 | 0.364-0.975 | 0.039* | 1.000 | 0.353-0.978 | 0.041* |
|        | High             | 0.596 |             |        | 0.587 |             |        |

**Supplementary Table4.** Independent prognostic factors for OS by stratified analysis in TCGA cohorts with age >median.

| Risk factors | Clinicopathological features | Univariate analysis |             |                | Multivariate analysis |          |                |
|--------------|------------------------------|---------------------|-------------|----------------|-----------------------|----------|----------------|
|              |                              | HR                  | 95% (CI)    | <i>P</i> value | HR                    | 95% (CI) | <i>P</i> value |
| Race         | White                        | 1.000               | 0.543-1.570 | 0.767          |                       |          |                |
|              | Others                       | 0.923               |             |                |                       |          |                |
| Gender       | Women                        | 1.000               | 0.684-1.761 | 0.700          |                       |          |                |
|              | Men                          | 1.098               |             |                |                       |          |                |
| TNM stage    | Stage I and II               | 1.000               | 1.384-3.511 | 0.001***       |                       |          |                |
|              | Stage III and IV             | 2.176               |             |                |                       |          |                |
